# Supplementary material for: Glycyrrhetinic acid might increase the nephrotoxicity of bakuchiol by inhibiting cytochrome P450 isoenzymes
Source: PeerJ. 2016 Nov 22;4:e2723. doi: 10.7717/peerj.2723 (PMC5126668; doi:10.7717/peerj.2723)
Supplement: Data S1 [file peerj-04-2723-s006.xlsx]

## Sheet: Table 4
		BAK group					BAK+ABT			BAK+GA
	time	Mean	SD			time	Mean	SD		Mean	SD
	0.083	82.511	80.105			0.083	111.699	105.109		157.473	111.897
	0.25	170.655	57.45			0.25	578.456	173.76		365.03	152.899
	0.5	273.397	31.453			0.5	795.954	114.041		331.985	54.782
	1	395.652	139.755			1	1185.05	473.226		401.077	111.818
	2	778.354	350.878			2	1709.78	386.23		780.964	179.459
	4	843.336	230.084			4	2235.38	747.622		1090.08	397.889
	8	369.703	152.845			8	1861.44	487.619		835.255	162.113
	12	154.214	60.803			12	1154.67	806.412		405.276	225.363
	24	68.119	10.546			24	261.061	87.957		72.056	37.457
Raw data
	BAK group
	Concentration in rat plasma（ng/ml）
	time (h)	1	2	3	4	5	mean	SD
	0.083	19.4403	20.1261	124.551	203.437	45.0018	82.5112	80.1049
	0.25	138.348	126.948	201.447	257.598	128.935	170.655	57.4497
	0.5	255.566	298.348	315.739	248.132	249.198	273.397	31.4532
	1	370.91	622.012	388.077	359.422	237.838	395.652	139.755
	2	741.835	1388.34	509.873	610.667	641.059	778.354	350.878
	4	880.735	1167.91	614.55	628.766	924.718	843.336	230.084
	8	297.448	580.24	453.584	180.567	336.676	369.703	152.845
	12	101.667	221.273	140.087	93.481	214.562	154.214	60.803
	24	76.9268	76.4074	58.9606	54.5787	73.7227	68.1192	10.5462
	(BAK+ABT) group
			Concentration in rat plasma（ng/ml）
		time (h)	1	2	3	4	5	mean	SD
		0.083	124.435	16.9541	286.871	61.3828	68.8503	111.699	105.109
		0.25	542.03	804.734	531.19	340.067	674.258	578.456	173.76
		0.5	784.135	772.736	964.588	645.546	812.763	795.954	114.041
		1	918.282	1022.63	2027.47	938.676	1018.18	1185.05	473.226
		2	1074.76	1739.01	2102.65	1904.5	1727.96	1709.77	386.23
		4	1105.39	2290.77	3110.74	2043.67	2626.3	2235.37	747.622
		8	2007.89	1990.07	2467.21	1139.77	1702.29	1861.44	487.619
		12	1955.69	655.377	2108.55	604.667	449.066	1154.67	806.412
		24	226.587	245.693	342.089	139.474	351.461	261.061	87.9568
	(BAK+GA) group
			Concentration in rat plasma（ng/ml）
		time (h)	1	2	3	4	5	mean	SD
		0.083	237.07	183.759	35.3043	283.934	47.2946	157.473	111.897
		0.25	394.693	614.455	284.497	311.697	219.806	365.03	152.899
		0.5	344.526	277.537	378.375	387.709	271.778	331.985	54.7815
		1	446.278	207.251	460.667	483.583	407.607	401.077	111.818
		2	1038.54	536.735	735.266	786.735	807.539	780.964	179.459
		4	1792.73	804.81	958.894	945.778	948.177	1090.08	397.889
		8	1036.6	632.298	931.086	858.035	718.256	835.255	162.113
		12	230.501	374.846	789.918	253.783	377.333	405.276	225.363
		24	54.567	31.2984	105.222	51.1992	117.992	72.0558	37.4572

## Sheet: Fig. 2 data
Exposure of BAK		24 h
	Plasma (μg/g)				Liver (μg/g)				Kidney (μg/g)
BAK	0.0769268				0.530998				0.661107
	0.0764074				0.561735				0.746601
	0.0589606				0.550177				0.784359
	0.0545787				0.563033				0.781318
	0.0737227				0.531411				0.803456
Mean	0.0681192			Mean	0.547471			Mean	0.755368
SD	0.0105462			SD	0.0156707			SD	0.0565427
BAK+ABT	0.226587				0.617564				0.982721
	0.245693				0.708681				0.977203
	0.342089				0.734322				1.0096
	0.139474				0.656026				0.868761
	0.351461				0.789267				0.973462
Mean	0.261061			Mean	0.701172			Mean	0.962349
SD	0.0879568			SD	0.0669787			SD	0.0541994
BAK+GA	0.054567				0.569051				1.00513
	0.0312984				0.612222				0.969303
	0.105222				0.615821				0.82061
	0.0511992				0.571442				0.70656
	0.117992				0.577191				0.838846
Mean	0.0720558			Mean	0.589145			Mean	0.86809
SD	0.0374572			SD	0.022936			SD	0.120651

## Sheet: Fig. 3.data
Cr(μmol/L)	Saline control	Vehicle control	Aristolochic acid A	BAK	ABT	GA	BAK+ABT	BAK+GA
	107.307	15.894	298.782	81.9198	32.2238	39.5769	66.5413	105.22
	37.2056	19.8625	308.97	38.7882	70.1803	110.905	82.5562	145.701
	89.2336	22.7305	369.706	90.3739	232.795	92.1006	67.7584	110.924
	76.7488	12.907	567.416	31.3511	120.365	68.029	120.203	192.635
	78.7623	59.9006	294.508	74.9057	41.2251	113.081	73.3311	251.451
Mean	77.8514	26.2589	367.877	63.4677	99.3578	84.7385	82.0781	161.186
SD	25.7454	19.1757	115.592	26.6262	82.1348	31.0683	22.2301	61.3088
BUN(mmol/L)	3.02064	3.17073	5.79737	4.07129	3.54597	3.54597	2.75797	3.05816
	2.7955	2.72045	6.02251	3.95872	1.96998	3.39587	3.95872	3.05816
	2.27017	3.09568	6.13508	4.52158	1.96998	1.89493	3.84615	3.32083
	1.96998	2.34522	7.37336	4.37148	2.6454	1.5197	2.75797	3.47092
	3.47092	3.17073	6.69794	3.69606	2.34522	2.19512	3.39587	4.22139
Mean	2.70544	2.90056	6.40525	4.12383	2.49531	2.51032	3.34334	3.42589
SD	0.596611	0.362252	0.634801	0.328839	0.652088	0.910514	0.574366	0.478626
NAG (IU/L)	3.51648	1.58242	23.9121	6.85714	4.04396	0.175824	8.79121	9.49451
	1.75824	1.40659	43.0769	9.31868	17.2308	2.46154	49.9341	19.6923
	6.50549	1.93407	48.1758	24.7912	0.527473	1.93407	20.044	22.3297
	3.86813	2.63736	27.4286	23.2088	2.81319	0.175824	1.93407	18.6374
	0.175824	2.81319	69.4505	9.84615	1.58242	4.21978	16.3516	8.61538
Mean	3.16484	2.07473	42.4088	14.8044	5.23956	1.79341	19.411	15.7538
SD	2.38175	0.626586	18.2448	8.48832	6.83162	1.70196	18.4367	6.26906
KIM-1(pg/mL)	16.4	30.4	804	36.8	20.4	11.4	124.8	76.8
	37.4	31.4	2994	20.8	24.4	0	74.8	32.8
	9.4	19.4	804	102.8	8.4	1.4	0	0
	14.4	0.4	624	26.8	24.4	0	0	244.8
	23.4	0	2464	96.8	21.4	25.4	56.8	86.8
Mean	20.2	16.32	1538	56.8	19.8	7.64	51.28	88.24
SD	10.849	15.451	1105.7	39.724	6.61816	11.014	53.0286	94.2124
