# Supplementary material for: Glycyrrhetinic acid might increase the nephrotoxicity of bakuchiol by inhibiting cytochrome P450 isoenzymes
Source: PeerJ. 2016 Nov 22;4:e2723. doi: 10.7717/peerj.2723 (PMC5126668; doi:10.7717/peerj.2723)
Supplement: Supplemental Information 2 [file peerj-04-2723-s003.xls]

## Sheet: Table 1
Without HLM
1
BAK	Absorbance			mean	cell viability（%）
30	0.419	0.403	0.517	0.446333	89.7216	86.2955	110.707
45	0.303	0.368	0.475	0.382	64.8822	78.8009	101.713
60	0.373	0.32	0.372	0.355	79.8715	68.5225	79.6574
75	0.279	0.222	0.199	0.233333	59.743	47.5375	42.6124
90	0.128	0.222	0.243	0.197667	27.409	47.5375	52.0343
Control	0.402	0.494	0.505	0.467	86.0814	105.782	108.137
2
BAK	Absorbance			mean	cell viability（%）
30	0.478	0.411	0.521	0.47	100	85.9833	108.996
45	0.342	0.396	0.484	0.407333	71.5481	82.8452	101.255
60	0.385	0.344	0.38	0.369667	80.5439	71.9665	79.4979
75	0.335	0.248	0.218	0.267	70.0837	51.8828	45.6067
90	0.154	0.236	0.281	0.223667	32.2176	49.3724	58.7866
Control	0.437	0.484	0.513	0.478	91.4226	101.255	107.322
3
BAK	Absorbance			mean	cell viability（%）
30	0.498	0.419	0.529	0.482	102.539	86.2732	108.922
45	0.365	0.409	0.49	0.421333	75.1544	84.2141	100.892
60	0.397	0.362	0.395	0.384667	81.7433	74.5367	81.3315
75	0.366	0.267	0.231	0.288	75.3603	54.976	47.5635
90	0.168	0.243	0.314	0.241667	34.5916	50.0343	64.6534
Control	0.453	0.49	0.514	0.485667	93.2739	100.892	105.834
Without HLM	Summary
BAK	cell viability（%）									mean	SD
Control	86.0814	105.782	108.137	91.4226	101.255	107.322	93.2739	100.892	105.834	100	7.92307
30	89.7216	86.2955	110.707	100	85.9833	108.996	102.539	86.2732	108.922	97.7153	10.6829
45	64.8822	78.8009	101.713	71.5481	82.8452	101.255	75.1544	84.2141	100.892	84.5895	13.7882
60	79.8715	68.5225	79.6574	80.5439	71.9665	79.4979	81.7433	74.5367	81.3315	77.519	4.69327
75	59.743	47.5375	42.6124	70.0837	51.8828	45.6067	75.3603	54.976	47.5635	55.0407	11.3299
90	27.409	47.5375	52.0343	32.2176	49.3724	58.7866	34.5916	50.0343	64.6534	46.293	12.4641
With HLM
1
BAK	Absorbance			mean	cell viability（%）
30	0.539	0.604	0.549	0.564	98.8386	110.758	100.672
45	0.506	0.643	0.576	0.575	92.7873	117.91	105.623
60	0.468	0.605	0.559	0.544	85.8191	110.941	102.506
75	0.587	0.596	0.634	0.605667	107.641	109.291	116.259
90	0.481	0.502	0.506	0.496333	88.2029	92.0538	92.7873
Control	0.614	0.496	0.526	0.545333	112.592	90.9535	96.4548
2
BAK	Absorbance			mean	cell viability（%）
30	0.547	0.585	0.544	0.558667	101.484	108.534	100.928
45	0.503	0.618	0.569	0.563333	93.321	114.657	105.566
60	0.477	0.597	0.556	0.543333	88.4972	110.761	103.154
75	0.573	0.578	0.605	0.585333	106.308	107.236	112.245
90	0.488	0.501	0.504	0.497667	90.538	92.9499	93.5065
Control	0.604	0.498	0.515	0.539	112.059	92.3933	95.5473
3
BAK	Absorbance			mean	cell viability（%）
30	0.553	0.579	0.538	0.556667	103.558	108.427	100.749
45	0.51	0.605	0.566	0.560333	95.5056	113.296	105.993
60	0.496	0.594	0.55	0.546667	92.8839	111.236	102.996
75	0.572	0.576	0.59	0.579333	107.116	107.865	110.487
90	0.5	0.508	0.502	0.503333	93.633	95.1311	94.0075
Control	0.604	0.505	0.493	0.534	113.109	94.5693	92.3221
With HLM	Summary
BAK	cell viability（%）									mean	SD
Control	112.592	90.9535	96.4548	112.059	92.3933	95.5473	113.109	94.5693	92.3221	100	9.59396
30	98.8386	110.758	100.672	101.484	108.534	100.928	103.558	108.427	100.749	103.772	4.32443
45	92.7873	117.91	105.623	93.321	114.657	105.566	95.5056	113.296	105.993	104.962	9.39485
60	85.8191	110.941	102.506	88.4972	110.761	103.154	92.8839	111.236	102.996	100.977	9.76227
75	107.641	109.291	116.259	106.308	107.236	112.245	107.116	107.865	110.487	109.383	3.18679
90	88.2029	92.0538	92.7873	90.538	92.9499	93.5065	93.633	95.1311	94.0075	92.5344	2.07
With HLM + GA
1
BAK	Absorbance			mean	cell viability（%）
30	0.404	0.372	0.392	0.389333	104.213	95.9587	101.118
45	0.386	0.359	0.383	0.376	99.5701	92.6053	98.7962
60	0.324	0.273	0.267	0.288	83.577	70.4213	68.8736
75	0.271	0.237	0.31	0.272667	69.9054	61.135	79.9656
90	0.169	0.186	0.2	0.185	43.5942	47.9794	51.5907
Control	0.386	0.408	0.369	0.387667	99.5701	105.245	95.1849
2
BAK	Absorbance			mean	cell viability（%）
30	0.398	0.372	0.381	0.383667	102.489	95.794	98.1116
45	0.404	0.374	0.392	0.39	104.034	96.309	100.944
60	0.311	0.275	0.275	0.287	80.0858	70.8155	70.8155
75	0.274	0.237	0.315	0.275333	70.5579	61.03	81.1159
90	0.171	0.191	0.211	0.191	44.0343	49.1845	54.3348
Control	0.386	0.405	0.374	0.388333	99.3991	104.292	96.309
3
BAK	Absorbance			mean	cell viability（%）
30	0.402	0.375	0.376	0.384333	102.03	95.1777	95.4315
45	0.398	0.383	0.386	0.389	101.015	97.2081	97.9695
60	0.31	0.278	0.279	0.289	78.6802	70.5584	70.8122
75	0.277	0.24	0.32	0.279	70.3046	60.9137	81.2183
90	0.175	0.195	0.219	0.196333	44.4162	49.4924	55.5838
Control	0.385	0.413	0.384	0.394	97.7157	104.822	97.4619
With HLM and GA	Summary
BAK	cell viability（%）									mean	SD
Control	99.5701	105.245	95.1849	99.3991	104.292	96.309	97.7157	104.822	97.4619	100	3.84382
30	104.213	95.9587	101.118	102.489	95.794	98.1116	102.03	95.1777	95.4315	98.9249	3.5467
45	99.5701	92.6053	98.7962	104.034	96.309	100.944	101.015	97.2081	97.9695	98.7169	3.26414
60	83.577	70.4213	68.8736	80.0858	70.8155	70.8155	78.6802	70.5584	70.8122	73.8488	5.3832
75	69.9054	61.135	79.9656	70.5579	61.03	81.1159	70.3046	60.9137	81.2183	70.6829	8.56264
90	43.5942	47.9794	51.5907	44.0343	49.1845	54.3348	44.4162	49.4924	55.5838	48.9123	4.39685
	SPSS analysis
					BAK	t-test（p value）
		With HLM	vs	With HLM + GA	30	0.657
					45	0.019
					60	8e-06
					75	1.4316e-07
					90	2.1921e-07
