# Supplementary material for: Glycyrrhetinic acid might increase the nephrotoxicity of bakuchiol by inhibiting cytochrome P450 isoenzymes
Source: PeerJ. 2016 Nov 22;4:e2723. doi: 10.7717/peerj.2723 (PMC5126668; doi:10.7717/peerj.2723)
Supplement: Supplemental Information 3 [file peerj-04-2723-s004.xlsx]

## Sheet: HPLC data
Effect of different concentrations of GA on the metabolism of BAK			30min
3 samples
		HLM-0.5mg/ml
BAK=10μM
t=0 min
sample	BAK peak area	internal standard (IS) peak area	GA peak area	ratio of BAK & IS	ratio of GA & IS	remaining of BAK (%)	remaining of GA (%)	Inhibition of BAK by GA
1	20158	3843		5.24538
2	21100	4174		5.0551
3	20135	4321		4.6598
BAK=10μM
t=30 min
1	12230	4100		2.98293		56.8677
2	12113	3694		3.2791		64.8671
3	12038	3759		3.20245		68.725
mean						63.4866
SD						6.048
BAK=10μM
GA=2.5μM
t=0 min
1	21649	4405	3906	4.91464	0.88672
2	20029	3845	4455	5.2091	1.15865
3	20965	4333	4202	4.83845	0.969767
BAK=10μM
GA=2.5μM
t=30 min
1	13330	3845	3953	3.46684	1.02809	70.541	115.943	31.701
2	13543	4867	3727	2.78262	0.765769	53.4184	66.0917	-32.5871
3	12758	3953	4457	3.22742	1.1275	66.7037	116.265	-6.46309
mean						63.5544	99.4331	-2.44975
SD						8.98527	28.875	32.3314
BAK=10μM
GA=12.5μM
t=0 min
1	22036	2904	21707	7.58815	7.47486
2	22990	3298	25847	6.97089	7.83717
3	22833	3355	23146	6.80566	6.89896
BAK=10μM
GA=12.5μM
t=30 min
1	16556	3377	23939	4.90258	7.08884	64.6083	94.8357	17.9462
2	14691	2886	21059	5.09044	7.29695	73.0242	93.1069	23.2177
3	16039	3054	23212	5.2518	7.60052	77.1681	110.169	26.9964
mean						71.6002	99.3706	22.7201
SD						6.39985	9.39171	4.54557
BAK=10μM
GA=62.5μM
t=0 min
1	21963	3863	140084	5.68548	36.263
2	20361	3258	144461	6.24954	44.3404
3	18362	3299	141286	5.56593	42.8269
BAK=10μM
GA=62.5μM
t=30 min
1	17532	3606	147259	4.8619	40.8372	85.5143	112.614	66.4157
2	16098	3555	160260	4.52827	45.0802	72.4577	101.668	21.6052
3	18066	3942	148587	4.58295	37.6933	82.3394	88.0131	43.5313
mean						80.1038	100.765	43.8507
SD						6.80937	12.3253	22.407
BAK=10μM
GA=93.75μM
t=0 min
1	31872	2987	233869	10.6702	78.2956
2	30353	3537	261956	8.58157	74.0616
3	29683	3042	247736	9.75773	81.4385
BAK=10μM
GA=93.75μM
t=30 min
1	28389	3599	266471	7.88802	74.0403	73.9255	94.5651	39.5476
2	29837	3732	279765	7.99491	74.9638	93.1637	101.218	80.5417
3	30999	3048	250846	10.1703	82.2986	104.228	101.056	113.519
mean						90.4391	98.9464	77.8693
SD						15.3339	3.79524	37.0578
BAK=10μM
GA=125μM
t=0 min
1	30266	3719	392587	8.13821	105.563
2	30548	3606	399161	8.47144	110.694
3	28260	3322	351973	8.50692	105.952
BAK=10μM
GA=125μM
t=30 min
1	29103	3619	387979	8.04172	107.206	98.8144	101.557	97.2513
2	26212	3225	376847	8.12775	116.852	95.943	105.563	88.4525
3	25537	3096	380987	8.24839	123.058	96.9608	116.145	90.2825
mean						97.2394	107.755	91.9954
SD						1.45583	7.53678	4.64279
	Summary
	GA concentration		0	2.5	12.5	62.5	93.75	125
	BAK percentage remaining（30min/0min）		63.49	63.55	71.6	80.1	90.44	97.24
	GA percentage remaining（30min/0min）			99.43	99.37	100.77	98.95	107.76
	corresponding standard deviation of BAK		6.05	8.99	6.4	6.81	15.33	1.46
	corresponding standard deviation of GA			28.88	9.39	12.33	3.8	7.54
		30min BAK metabolic percentage (%)		36.5134
	GA concentration		2.5	12.5	62.5	93.75	125
	the metabolism of BAK inhibition rate (%)		-2.45	22.72	43.85	77.87	92
	Corresponding standard deviation		32.33	4.55	22.41	37.06	4.64
