# Supplementary material for: Glycyrrhetinic acid might increase the nephrotoxicity of bakuchiol by inhibiting cytochrome P450 isoenzymes
Source: PeerJ. 2016 Nov 22;4:e2723. doi: 10.7717/peerj.2723 (PMC5126668; doi:10.7717/peerj.2723)
Supplement: Supplemental Information 4 [file peerj-04-2723-s005.xlsx]

## Sheet: summary
		CYP1A2
CYP1A2-30min	Generation amount of metabolites	3 parallel samples			Mean	SD	Control	Relative activity (%)	Standard deviation / controls * 100	Concentration	log value
	Control group	373.794	343.903	369.255	362.317	16.108	362.317	100	4.44584
GA	0.1	336.731	336.13	359.662	344.174	13.4157	362.317	94.9926	3.70275	0.1	-1
	1	291.334	312.828	311.844	305.335	12.1356	362.317	84.2729	3.34945	1	0
	6.25	328.738	326.356	314.665	323.253	7.53168	362.317	89.2182	2.07875	6.25	0.79588
	31.25	244.335	250.48	275.772	256.862	16.6621	362.317	70.8943	4.59877	31.25	1.49485
	100	129.531	99.1292	108.668	112.443	15.5484	362.317	31.0343	4.29138	100	2
	156.25	60.4853	74.629	62.1781	65.7641	7.72373	362.317	18.151	2.13176	156.25	2.19382
	234.375	0	111.598	0	37.1993	0	362.317	10.267	0	234.375	2.36991
	312.5	0	70.2138	83.5499	51.2545	9.43003	362.317	14.1463	2.6027	312.5	2.49485
	1000	0	62.303	0	20.7677	0	362.317	5.73191	0	1000	3
		CYP2C9
CYP2C9-30min	Generation amount of metabolites	3 parallel samples
	Control group	26.7462	23.1546	24.5376	24.8128	1.81157	24.8128	100	7.30095
GA	0.1	26.3173	29.8437	28.5449	28.2353	1.78346	24.8128	113.793	6.31642
	1	19.0551	21.3008	19.9739	20.1099	1.12904	24.8128	81.0466	4.55024
	6.25	18.4036	19.4	18.9084	18.904	0.498232	24.8128	76.1866	2.00797
	31.25	13.5087	15.235	13.0171	13.9203	1.1648	24.8128	56.1012	4.69436
	100	13.6051	10.1871	12.5943	12.1288	1.75592	24.8128	48.8814	7.07667
	156.25	10.6015	11.471	12.2867	11.4531	0.842716	24.8128	46.158	3.3963
	234.375	9.48908	9.95587	7.31104	8.91866	1.41167	24.8128	35.9438	5.68928
	312.5	3.64463	6.40499	3.38819	4.47927	1.67264	24.8128	18.0523	6.74105
	1000	4.66341	2.49812	3.902	3.68784	1.09842	24.8128	14.8627	4.42682
		CYP2C19
CYP2C19-30min	Generation amount of metabolites	3 parallel samples
	Control group	70.9087	68.8745	68.4296	69.4043	1.32169	69.4043	100	1.90433
GA	0.1	84.7281	80.1285	78.4932	81.1166	3.23274	69.4043	116.875	4.65784
	1	69.1747	74.356	75.2448	72.9251	3.27826	69.4043	105.073	4.72343
	6.25	60.5143	59.882	62.8793	61.0919	1.57993	69.4043	88.0233	2.27641
	31.25	57.2985	57.8035	51.5142	55.5387	3.49451	69.4043	80.0221	5.03501
	100	56.1231	45.2275	49.588	50.3129	5.48384	69.4043	72.4925	7.9013
	156.25	38.6508	44.5737	37.3262	40.1835	3.85922	69.4043	57.8978	5.56049
	234.375	36.3349	40.3786	0	25.5712	2.85932	69.4043	36.8438	4.1198
	312.5	0	0	0	0	0	69.4043	0	0
	1000	0	0	0	0	0	69.4043	0	0
		CYP2D6
CYP2D6-30min	Generation amount of metabolites	3 parallel samples
	Control group	218.159	192.884	191.58	200.874	14.9831	200.874	100	7.45896
GA	0.1	187.932	187.015	205.699	193.548	10.5325	200.874	96.3529	5.24333
	1	186.202	188.191	182.199	185.531	3.05162	200.874	92.3616	1.51917
	6.25	195.787	197.619	185.048	192.818	6.79123	200.874	95.9892	3.38083
	31.25	178.4	191.456	179.424	183.093	7.25995	200.874	91.1482	3.61417
	100	157.039	171.064	184.478	170.861	13.7207	200.874	85.0584	6.83047
	156.25	164.345	161.143	166.652	164.046	2.76654	200.874	81.6661	1.37725
	234.375	139.335	133.567	146.959	139.954	6.71763	200.874	69.6722	3.34419
	312.5	78.3543	93.8447	80.9689	84.3893	8.29232	200.874	42.011	4.12811
	1000	49.8592	61.5434	65.4237	58.9421	8.10178	200.874	29.3428	4.03325
		CYP3A4
CYP3A4-30min	Generation amount of metabolites	3 parallel samples
	Control group	183.5	175.149	163.996	174.215	9.78571	174.215	100	5.61703
GA	0.1	44.5498		167.111	167.111	0	174.215	95.9222	0
	1	112.543		10.6253	112.543	0	174.215	64.6001	0
	6.25	77.9525	63.0592	63.5049	68.1722	8.47294	174.215	39.1311	4.86349
	31.25	15.7571	28.7162	25.8364	23.4366	6.80472	174.215	13.4527	3.90593
	100	30.2496	22.8529	0.431171	26.5512	5.23023	174.215	15.2405	3.00217
	156.25	18.65	24.8446	25.0491	22.8479	3.63692	174.215	13.1148	2.0876
	234.375	5.68729	3.55308	9.71837	6.31958	3.1309	174.215	3.62746	1.79715
	312.5	0	1.14809	0.216096	0.454727	0.61011	174.215	0.261015	0.350205
	1000	0.822992	0.476842	0.25579	0.518541	0.285891	174.215	0.297644	0.164102
					red data was exclusion
		CYP1A2
CYP1A2-30min	Generation amount of metabolites	3 parallel samples			T-TEST	p
	Control group	373.794	343.903	369.255
GA	0.1	336.731	336.13	359.662	0.1 vs0	0.104121
	1	291.334	312.828	311.844	1 vs0	0.00404025
	6.25	328.738	326.356	314.665	6.25 vs0	0.00951036
	31.25	244.335	250.48	275.772	31.25vs0	0.000700618
	100	129.531	99.1292	108.668	100vs0	2.1103e-05
	156.25	60.4853	74.629	62.1781	156.25vs0	4.35408e-06
	234.375	0	111.598	0	234.375vs0	0.000530297
	312.5	0	70.2138	83.5499	312.5vs0	0.000174903
	1000	0	62.303	0	1000vs0	5.73937e-05
		CYP2C9
CYP2C9-30min	Generation amount of metabolites	3 parallel samples
	Negative control group	26.7462	23.1546	24.5376
GA	0.1	26.3173	29.8437	28.5449	0.1 vs0	0.040044
	1	19.0551	21.3008	19.9739	1 vs0	0.00942158
	6.25	18.4036	19.4	18.9084	6.25 vs0	0.00275843
	31.25	13.5087	15.235	13.0171	31.25vs0	0.00046807
	100	13.6051	10.1871	12.5943	100vs0	0.000478864
	156.25	10.6015	11.471	12.2867	156.25vs0	0.000158774
	234.375	9.48908	9.95587	7.31104	234.375vs0	0.000138811
	312.5	3.64463	6.40499	3.38819	312.5vs0	6.97761e-05
	1000	4.66341	2.49812	3.902	1000vs0	3.29773e-05
		CYP2C19
CYP2C19-30min	Generation amount of metabolites	3 parallel samples
	Negative control group	70.9087	68.8745	68.4296
GA	0.1	84.7281	80.1285	78.4932	0.1 vs0	0.00218556
	1	69.1747	74.356	75.2448	1 vs0	0.0797795
	6.25	60.5143	59.882	62.8793	6.25 vs0	0.00110223
	31.25	57.2985	57.8035	51.5142	31.25vs0	0.00150589
	100	56.1231	45.2275	49.588	100vs0	0.00211362
	156.25	38.6508	44.5737	37.3262	156.25vs0	0.000121301
	234.375	36.3349	40.3786	0	234.375vs0	0.0135372
	312.5	0	0	0	312.5vs0	4.38023e-08
	1000	0	0	0	1000vs0	4.38023e-08
		CYP2D6
CYP2D6-30min	Generation amount of metabolites	3 parallel samples
	Negative control group	218.159	192.884	191.58
GA	0.1	187.932	187.015	205.699	0.1 vs0	0.263269
	1	186.202	188.191	182.199	1 vs0	0.0785994
	6.25	195.787	197.619	185.048	6.25 vs0	0.222032
	31.25	178.4	191.456	179.424	31.25vs0	0.0690126
	100	157.039	171.064	184.478	100vs0	0.0313586
	156.25	164.345	161.143	166.652	156.25vs0	0.00692247
	234.375	139.335	133.567	146.959	234.375vs0	0.00150755
	312.5	78.3543	93.8447	80.9689	312.5vs0	0.000148497
	1000	49.8592	61.5434	65.4237	1000vs0	6.69846e-05
		CYP3A4
CYP3A4-30min	Generation amount of metabolites	3 parallel samples
	Negative control group	183.5	175.149	163.996
GA	0.1	44.5498		167.111	0.1 vs0	0.117911
	1	112.543		10.6253	1 vs0	0.0309448
	6.25	77.9525	63.0592	63.5049	6.25 vs0	7.16146e-05
	31.25	15.7571	28.7162	25.8364	31.25vs0	1.28376e-05
	100	30.2496	22.8529	0.431171	100vs0	6.1372e-05
	156.25	18.65	24.8446	25.0491	156.25vs0	7.46323e-06
	234.375	5.68729	3.55308	9.71837	234.375vs0	4.63594e-06
	312.5	0	1.14809	0.216096	312.5vs0	3.35543e-06
	1000	0.822992	0.476842	0.25579	1000vs0	3.34014e-06

## Sheet: CYP1A2
Sample							purexitong Method	purexitong Results
		Name	Data File	Type	Level	Acq. Date-Time	Exp. Conc.	RT	Resp.	MI	Calc. Conc.	Final Conc.	Accuracy
		hunbiao-1	hunbiao1.d	Cal	1	2011-12-06 17:58:51	1	0.48865	21.39	FALSE	1.08076	1.08076	108.076
		hunbiao-10	hunbiao2.d	Cal	2	2011-12-06 18:03:45	10	0.545383	127.474	FALSE	17.9798	17.9798	179.798
		hunbaio-50	hunbiao3.d	Cal	3	2011-12-06 18:08:39	100	0.517017	591.471	FALSE	91.8939	91.8939	91.8939
		hunbiao-100	hunbiao4.d	Cal	4	2011-12-06 18:13:32	250	0.517017	1126.63	FALSE	177.145	177.145	70.8579
		hunbiao-250	hunbiao5.d	Cal	5	2011-12-06 18:18:24	500	0.502833	3104.87	FALSE	492.274	492.274	98.4549
		hunbiao-500	hunbiao6.d	Cal	6	2011-12-06 18:23:16	1000	0.502833	6391	FALSE	1015.75	1015.75	101.575
		yangxingduizhao0-0-1	blank-3.d	Blank		2012-01-17 01:46:17				FALSE
		yangxingduizhao0-0-2	yang-1.d	Sample		2012-01-17 01:51:11				FALSE
		yangxingduizhao0-0-3	yang-2.d	Sample		2012-01-17 01:56:05				FALSE
		yangxingduizhao0-30-1	yang-3.d	Sample		2012-01-17 02:00:59		0.517017	2988.85	FALSE	473.794	473.794
		yangxingduizhao0-30-2	yang-4.d	Sample		2012-01-17 02:05:53		0.517017	1985.13	FALSE	313.903	313.903
		yangxingduizhao0-30-3	yang-5.d	Sample		2012-01-17 02:10:47		0.517017	1893.18	FALSE	299.255	299.255
		ga0.1-1-0	yang-6.d	Sample		2012-01-17 02:15:39				FALSE
		ga0.1-2-0	yang-7.d	Sample		2012-01-17 02:20:31				FALSE
		ga0.1-3-0	yang-8.d	Sample		2012-01-17 02:25:24				FALSE
		ga0.1-1-30	yang-9.d	Sample		2012-01-17 02:30:17		0.517017	2065.67	FALSE	326.731	326.731
		ga0.1-2-30	yang-10.d	Sample		2012-01-17 02:35:11		0.517017	2061.89	FALSE	326.13	326.13
		ga0.1-3-30	yang-11.d	Sample		2012-01-17 02:40:04		0.517017	2397.94	FALSE	379.662	379.662
		ga1-1-0	yang-12.d	Sample		2012-01-17 02:44:58				FALSE
		ga1-2-0	yang-13.d	Sample		2012-01-17 02:49:51		0.205017	209.383	FALSE	31.0278	31.0278
		ga1-3-0	yang-14.d	Sample		2012-01-17 02:54:45				FALSE
		ga1-1-30	yang-15.d	Sample		2012-01-17 02:59:39		0.517017	1717.91	FALSE	271.334	271.334
		ga1-2-30	yang-16.d	Sample		2012-01-17 03:04:33		0.517017	1978.39	FALSE	312.828	312.828
		ga1-3-30	yang-17.d	Sample		2012-01-17 03:09:25		0.517017	2097.76	FALSE	331.844	331.844
		ga6.25-1-0	yang-18.d	Sample		2012-01-17 03:14:19				FALSE
		ga6.25-2-0	yang-19.d	Sample		2012-01-17 03:19:11				FALSE
		ga6.25-3-0	yang-20.d	Sample		2012-01-17 03:24:05				FALSE
		ga6.25-1-30	yang-21.d	Sample		2012-01-17 03:28:57		0.517017	2078.26	FALSE	328.738	328.738
		ga6.25-2-30	yang-22.d	Sample		2012-01-17 03:33:51		0.517017	2063.31	FALSE	326.356	326.356
		ga6.25-3-30	yang-23.d	Sample		2012-01-17 03:38:45		0.517017	1989.92	FALSE	314.665	314.665
		ga31.25-1-0	yang-24.d	Sample		2012-01-17 03:43:36				FALSE
		ga31.25-2-0	yang-25.d	Sample		2012-01-17 03:48:29				FALSE
		ga31.25-3-0	yang-26.d	Sample		2012-01-17 03:53:23				FALSE
		ga31.25-1-30	yang-27.d	Sample		2012-01-17 03:58:16		0.502833	1548.42	FALSE	244.335	244.335
		ga31.25-2-30	yang-28.d	Sample		2012-01-17 04:03:11		0.517017	1586.99	FALSE	250.48	250.48
		ga31.25-3-30	yang-29.d	Sample		2012-01-17 04:08:05		0.517017	1745.77	FALSE	275.772	275.772
		ga100-1-0	yang-30.d	Sample		2012-01-17 04:12:59				FALSE
		ga100-2-0	yang-31.d	Sample		2012-01-17 04:17:51				FALSE
		ga100-3-0	yang-32.d	Sample		2012-01-17 04:22:45				FALSE
		ga100-1-30	yang-33.d	Sample		2012-01-17 04:27:39		0.517017	827.738	FALSE	129.531	129.531
		ga100-2-30	yang-34.d	Sample		2012-01-17 04:32:33		0.517017	636.891	FALSE	99.1292	99.1292
		ga100-3-30	yang-35.d	Sample		2012-01-17 04:37:27		0.517017	696.77	FALSE	108.668	108.668
		ga156.25-1-0	yang-36.d	Sample		2012-01-17 04:42:20		0.261733	355.226	FALSE	54.2604	54.2604
		ga156.25-2-0	yang-37.d	Sample		2012-01-17 04:47:12				FALSE
		ga156.25-3-0	yang-38.d	Sample		2012-01-17 04:52:07				FALSE
		ga156.25-1-30	yang-39.d	Sample		2012-01-17 04:57:01		0.517017	394.303	FALSE	60.4853	60.4853
		ga156.25-2-30	yang-40.d	Sample		2012-01-17 05:01:55		0.17665	483.09	FALSE	74.629	74.629
		ga156.25-3-30	yang-41.d	Sample		2012-01-17 05:06:49		0.517017	404.93	FALSE	62.1781	62.1781
		ga234-1-0	yang-42.d	Sample		2012-01-17 05:11:43				FALSE
		ga234-2-0	yang-43.d	Sample		2012-01-17 05:16:37				FALSE
		ga234-3-0	yang-44.d	Sample		2012-01-17 05:21:31				FALSE
		ga234-1-30	yang-45.d	Sample		2012-01-17 05:26:25				FALSE
		ga234-2-30	yang-46.d	Sample		2012-01-17 05:31:16		0.0632	715.163	FALSE	111.598	111.598
		ga234-3-30	yang-47.d	Sample		2012-01-17 05:36:09				FALSE
		ga312.5-1-0	yang-48.d	Sample		2012-01-17 05:41:02				FALSE
		ga312.5-2-0	yang-49.d	Sample		2012-01-17 05:45:55				FALSE
		ga312.5-3-0	yang-50.d	Sample		2012-01-17 05:50:49				FALSE
		ga312.5-1-30	yang-51.d	Sample		2012-01-17 05:55:41				FALSE
		ga312.5-2-30	yang-52.d	Sample		2012-01-17 06:00:34		0.190833	367.488	FALSE	56.2138	56.2138
		ga312.5-3-30	yang-53.d	Sample		2012-01-17 06:05:25		0.0915667	626.976	FALSE	97.5499	97.5499
		ga1000-1-0	yang-54.d	Sample		2012-01-17 06:10:17				FALSE
		ga1000-2-0	yang-55.d	Sample		2012-01-17 06:15:09				FALSE
		ga1000-3-0	yang-56.d	Sample		2012-01-17 06:20:01				FALSE
		ga1000-1-30	yang-57.d	Sample		2012-01-17 06:24:53				FALSE
		ga1000-2-30	yang-58.d	Sample		2012-01-17 06:29:45		0.0915667	405.714	FALSE	62.303	62.303
		ga1000-3-30	yang-59.d	Sample		2012-01-17 06:34:37				FALSE
		wash	yang-60.d	Blank		2012-01-17 06:40:40				FALSE

## Sheet: CYP2C9
Sample							4-qiangjimeifentuoying Method	4-qiangjimeifentuoying Results
		Name	Data File	Type	Level	Acq. Date-Time	Exp. Conc.	RT	Resp.	MI	Calc. Conc.	Final Conc.	Accuracy
		hunbiao-1	hunbiao1.d	Cal	1	2011-12-06 17:58:51	1	0.6977	115.277	FALSE	9.15548	9.15548	915.548
		hunbiao-10	hunbiao2.d	Cal	2	2011-12-06 18:03:45	10	0.669333	278.692	FALSE	21.2876	21.2876	212.876
		hunbaio-50	hunbiao3.d	Cal	3	2011-12-06 18:08:39	100	0.6977	1150.14	FALSE	85.9856	85.9856	85.9856
		hunbiao-100	hunbiao4.d	Cal	4	2011-12-06 18:13:32	250	0.669333	2932.86	FALSE	218.337	218.337	87.3349
		hunbiao-250	hunbiao5.d	Cal	5	2011-12-06 18:18:24	500	0.669333	7185.71	FALSE	534.076	534.076	106.815
		hunbiao-500	hunbiao6.d	Cal	6	2011-12-06 18:23:16	1000	0.683517	13355.9	FALSE	992.158	992.158	99.2158
		yangxingduizhao0-0-1	blank-3.d	Blank		2012-01-17 01:46:17				FALSE
		yangxingduizhao0-0-2	yang-1.d	Sample		2012-01-17 01:51:11				FALSE
		yangxingduizhao0-0-3	yang-2.d	Sample		2012-01-17 01:56:05				FALSE
		yangxingduizhao0-30-1	yang-3.d	Sample		2012-01-17 02:00:59		0.711883	433.033	FALSE	32.7462	32.7462
		yangxingduizhao0-30-2	yang-4.d	Sample		2012-01-17 02:05:53		0.726067	223.021	FALSE	17.1546	17.1546
		yangxingduizhao0-30-3	yang-5.d	Sample		2012-01-17 02:10:47		0.711883	322.467	FALSE	24.5376	24.5376
		ga0.1-1-0	yang-6.d	Sample		2012-01-17 02:15:39				FALSE
		ga0.1-2-0	yang-7.d	Sample		2012-01-17 02:20:31				FALSE
		ga0.1-3-0	yang-8.d	Sample		2012-01-17 02:25:24				FALSE
		ga0.1-1-30	yang-9.d	Sample		2012-01-17 02:30:17		0.683517	332.969	FALSE	25.3173	25.3173
		ga0.1-2-30	yang-10.d	Sample		2012-01-17 02:35:11		0.683517	407.407	FALSE	30.8437	30.8437
		ga0.1-3-30	yang-11.d	Sample		2012-01-17 02:40:04		0.683533	389.913	FALSE	29.5449	29.5449
		ga1-1-0	yang-12.d	Sample		2012-01-17 02:44:58				FALSE
		ga1-2-0	yang-13.d	Sample		2012-01-17 02:49:51
		ga1-3-0	yang-14.d	Sample		2012-01-17 02:54:45				FALSE
		ga1-1-30	yang-15.d	Sample		2012-01-17 02:59:39		0.754433	208.211	FALSE	16.0551	16.0551
		ga1-2-30	yang-16.d	Sample		2012-01-17 03:04:33		0.711883	319.277	FALSE	24.3008	24.3008
		ga1-3-30	yang-17.d	Sample		2012-01-17 03:09:25		0.683517	260.996	FALSE	19.9739	19.9739
		ga6.25-1-0	yang-18.d	Sample		2012-01-17 03:14:19				FALSE
		ga6.25-2-0	yang-19.d	Sample		2012-01-17 03:19:11				FALSE
		ga6.25-3-0	yang-20.d	Sample		2012-01-17 03:24:05		0.598433	13.8266	FALSE	1.62365	1.62365
		ga6.25-1-30	yang-21.d	Sample		2012-01-17 03:28:57		0.6977	320.662	FALSE	24.4036	24.4036
		ga6.25-2-30	yang-22.d	Sample		2012-01-17 03:33:51		0.6977	253.266	FALSE	19.4	19.4
		ga6.25-3-30	yang-23.d	Sample		2012-01-17 03:38:45		0.6977	165.828	FALSE	12.9084	12.9084
		ga31.25-1-0	yang-24.d	Sample		2012-01-17 03:43:36				FALSE
		ga31.25-2-0	yang-25.d	Sample		2012-01-17 03:48:29
		ga31.25-3-0	yang-26.d	Sample		2012-01-17 03:53:23				FALSE
		ga31.25-1-30	yang-27.d	Sample		2012-01-17 03:58:16		0.6977	173.913	FALSE	13.5087	13.5087
		ga31.25-2-30	yang-28.d	Sample		2012-01-17 04:03:11		0.711883	197.165	FALSE	15.235	15.235
		ga31.25-3-30	yang-29.d	Sample		2012-01-17 04:08:05		0.711883	167.292	FALSE	13.0171	13.0171
		ga100-1-0	yang-30.d	Sample		2012-01-17 04:12:59		0.612617	11.933	FALSE	1.48306	1.48306
		ga100-2-0	yang-31.d	Sample		2012-01-17 04:17:51				FALSE
		ga100-3-0	yang-32.d	Sample		2012-01-17 04:22:45				FALSE
		ga100-1-30	yang-33.d	Sample		2012-01-17 04:27:39		0.711883	175.211	FALSE	13.6051	13.6051
		ga100-2-30	yang-34.d	Sample		2012-01-17 04:32:33		0.711883	129.172	FALSE	10.1871	10.1871
		ga100-3-30	yang-35.d	Sample		2012-01-17 04:37:27		0.6977	161.597	FALSE	12.5943	12.5943
		ga156.25-1-0	yang-36.d	Sample		2012-01-17 04:42:20				FALSE
		ga156.25-2-0	yang-37.d	Sample		2012-01-17 04:47:12				FALSE
		ga156.25-3-0	yang-38.d	Sample		2012-01-17 04:52:07				FALSE
		ga156.25-1-30	yang-39.d	Sample		2012-01-17 04:57:01		0.726067	134.755	FALSE	10.6015	10.6015
		ga156.25-2-30	yang-40.d	Sample		2012-01-17 05:01:55		0.726067	106.058	FALSE	8.47104	8.47104
		ga156.25-3-30	yang-41.d	Sample		2012-01-17 05:06:49		0.726067	197.861	FALSE	15.2867	15.2867
		ga234-1-0	yang-42.d	Sample		2012-01-17 05:11:43				FALSE
		ga234-2-0	yang-43.d	Sample		2012-01-17 05:16:37				FALSE
		ga234-3-0	yang-44.d	Sample		2012-01-17 05:21:31
		ga234-1-30	yang-45.d	Sample		2012-01-17 05:26:25		0.6977	119.77	FALSE	9.48908	9.48908
		ga234-2-30	yang-46.d	Sample		2012-01-17 05:31:16		0.726067	126.058	FALSE	9.95587	9.95587
		ga234-3-30	yang-47.d	Sample		2012-01-17 05:36:09		0.6977	90.4332	FALSE	7.31104	7.31104
		ga312.5-1-0	yang-48.d	Sample		2012-01-17 05:41:02				FALSE
		ga312.5-2-0	yang-49.d	Sample		2012-01-17 05:45:55				FALSE
		ga312.5-3-0	yang-50.d	Sample		2012-01-17 05:50:49				FALSE
		ga312.5-1-30	yang-51.d	Sample		2012-01-17 05:55:41		0.683517	41.0483	FALSE	3.64463	3.64463
		ga312.5-2-30	yang-52.d	Sample		2012-01-17 06:00:34		0.726067	78.229	FALSE	6.40499	6.40499
		ga312.5-3-30	yang-53.d	Sample		2012-01-17 06:05:25		0.754433	37.5942	FALSE	3.38819	3.38819
		ga1000-1-0	yang-54.d	Sample		2012-01-17 06:10:17
		ga1000-2-0	yang-55.d	Sample		2012-01-17 06:15:09				FALSE
		ga1000-3-0	yang-56.d	Sample		2012-01-17 06:20:01				FALSE
		ga1000-1-30	yang-57.d	Sample		2012-01-17 06:24:53		0.669333	54.7707	FALSE	4.66341	4.66341
		ga1000-2-30	yang-58.d	Sample		2012-01-17 06:29:45		0.711883	25.6053	FALSE	2.49812	2.49812
		ga1000-3-30	yang-59.d	Sample		2012-01-17 06:34:37		0.726067	44.515	FALSE	3.902	3.902
		wash	yang-60.d	Blank		2012-01-17 06:40:40				FALSE

## Sheet: CYP2C19
Sample							4-qianjijiabenhuangdingniao Method	4-qianjijiabenhuangdingniao Results
		Name	Data File	Type	Level	Acq. Date-Time	Exp. Conc.	RT	Resp.	MI	Calc. Conc.	Final Conc.	Accuracy
		hunbiao-1	hunbiao1.d	Cal	1	2011-12-06 17:58:51	1	0.937217	36.5093	FALSE	39.7582	39.7582	3975.82
		hunbiao-10	hunbiao2.d	Cal	2	2011-12-06 18:03:45	10	1.1074	92.7289	FALSE	51.1923	51.1923	511.923
		hunbaio-50	hunbiao3.d	Cal	3	2011-12-06 18:08:39	100	1.05067	362.021	FALSE	105.962	105.962	105.962
		hunbiao-100	hunbiao4.d	Cal	4	2011-12-06 18:13:32	250	1.05067	818.556	FALSE	198.813	198.813	79.5253
		hunbiao-250	hunbiao5.d	Cal	5	2011-12-06 18:18:24	500	1.0365	1842.42	FALSE	407.049	407.049	81.4098
		hunbiao-500	hunbiao6.d	Cal	6	2011-12-06 18:23:16	1000	1.05067	5044.14	FALSE	1058.23	1058.23	105.823
		yangxingduizhao0-0-1	blank-3.d	Blank		2012-01-17 01:46:17
		yangxingduizhao0-0-2	yang-1.d	Sample		2012-01-17 01:51:11
		yangxingduizhao0-0-3	yang-2.d	Sample		2012-01-17 01:56:05				FALSE
		yangxingduizhao0-30-1	yang-3.d	Sample		2012-01-17 02:00:59		1.09322	199.504	FALSE	72.9087	72.9087
		yangxingduizhao0-30-2	yang-4.d	Sample		2012-01-17 02:05:53		1.09322	214.087	FALSE	75.8745	75.8745
		yangxingduizhao0-30-3	yang-5.d	Sample		2012-01-17 02:10:47		1.09322	133.23	FALSE	59.4296	59.4296
		ga0.1-1-0	yang-6.d	Sample		2012-01-17 02:15:39				FALSE
		ga0.1-2-0	yang-7.d	Sample		2012-01-17 02:20:31		1.83067	29.6827	FALSE	38.3698	38.3698
		ga0.1-3-0	yang-8.d	Sample		2012-01-17 02:25:24				FALSE
		ga0.1-1-30	yang-9.d	Sample		2012-01-17 02:30:17		1.07905	257.618	FALSE	84.7281	84.7281
		ga0.1-2-30	yang-10.d	Sample		2012-01-17 02:35:11		1.09322	235.003	FALSE	80.1285	80.1285
		ga0.1-3-30	yang-11.d	Sample		2012-01-17 02:40:04		1.06487	226.963	FALSE	78.4932	78.4932
		ga1-1-0	yang-12.d	Sample		2012-01-17 02:44:58		0.299033	26.6518	FALSE	37.7533	37.7533
		ga1-2-0	yang-13.d	Sample		2012-01-17 02:49:51				FALSE
		ga1-3-0	yang-14.d	Sample		2012-01-17 02:54:45				FALSE
		ga1-1-30	yang-15.d	Sample		2012-01-17 02:59:39		1.06485	117.226	FALSE	56.1747	56.1747
		ga1-2-30	yang-16.d	Sample		2012-01-17 03:04:33		1.07903	270.54	FALSE	87.356	87.356
		ga1-3-30	yang-17.d	Sample		2012-01-17 03:09:25		1.1074	210.991	FALSE	75.2448	75.2448
		ga6.25-1-0	yang-18.d	Sample		2012-01-17 03:14:19				FALSE
		ga6.25-2-0	yang-19.d	Sample		2012-01-17 03:19:11				FALSE
		ga6.25-3-0	yang-20.d	Sample		2012-01-17 03:24:05				FALSE
		ga6.25-1-30	yang-21.d	Sample		2012-01-17 03:28:57		1.09322	118.896	FALSE	56.5143	56.5143
		ga6.25-2-30	yang-22.d	Sample		2012-01-17 03:33:51		1.09322	135.455	FALSE	59.882	59.882
		ga6.25-3-30	yang-23.d	Sample		2012-01-17 03:38:45		1.07903	169.859	FALSE	66.8793	66.8793
		ga31.25-1-0	yang-24.d	Sample		2012-01-17 03:43:36				FALSE
		ga31.25-2-0	yang-25.d	Sample		2012-01-17 03:48:29				FALSE
		ga31.25-3-0	yang-26.d	Sample		2012-01-17 03:53:23				FALSE
		ga31.25-1-30	yang-27.d	Sample		2012-01-17 03:58:16		1.05067	122.752	FALSE	57.2985	57.2985
		ga31.25-2-30	yang-28.d	Sample		2012-01-17 04:03:11		1.09322	125.235	FALSE	57.8035	57.8035
		ga31.25-3-30	yang-29.d	Sample		2012-01-17 04:08:05		1.09322	94.3114	FALSE	51.5142	51.5142
		ga100-1-0	yang-30.d	Sample		2012-01-17 04:12:59				FALSE
		ga100-2-0	yang-31.d	Sample		2012-01-17 04:17:51				FALSE
		ga100-3-0	yang-32.d	Sample		2012-01-17 04:22:45				FALSE
		ga100-1-30	yang-33.d	Sample		2012-01-17 04:27:39		1.07903	116.973	FALSE	56.1231	56.1231
		ga100-2-30	yang-34.d	Sample		2012-01-17 04:32:33		1.1074	63.401	FALSE	45.2275	45.2275
		ga100-3-30	yang-35.d	Sample		2012-01-17 04:37:27		1.09322	84.8407	FALSE	49.588	49.588
		ga156.25-1-0	yang-36.d	Sample		2012-01-17 04:42:20				FALSE
		ga156.25-2-0	yang-37.d	Sample		2012-01-17 04:47:12				FALSE
		ga156.25-3-0	yang-38.d	Sample		2012-01-17 04:52:07				FALSE
		ga156.25-1-30	yang-39.d	Sample		2012-01-17 04:57:01		1.09322	31.0644	FALSE	38.6508	38.6508
		ga156.25-2-30	yang-40.d	Sample		2012-01-17 05:01:55		1.1074	60.1861	FALSE	44.5737	44.5737
		ga156.25-3-30	yang-41.d	Sample		2012-01-17 05:06:49		1.09323	24.5514	FALSE	37.3262	37.3262
		ga234-1-0	yang-42.d	Sample		2012-01-17 05:11:43				FALSE
		ga234-2-0	yang-43.d	Sample		2012-01-17 05:16:37				FALSE
		ga234-3-0	yang-44.d	Sample		2012-01-17 05:21:31				FALSE
		ga234-1-30	yang-45.d	Sample		2012-01-17 05:26:25		1.1074	19.6775	FALSE	36.3349	36.3349
		ga234-2-30	yang-46.d	Sample		2012-01-17 05:31:16		1.09322	39.5596	FALSE	40.3786	40.3786
		ga234-3-30	yang-47.d	Sample		2012-01-17 05:36:09				FALSE
		ga312.5-1-0	yang-48.d	Sample		2012-01-17 05:41:02				FALSE
		ga312.5-2-0	yang-49.d	Sample		2012-01-17 05:45:55				FALSE
		ga312.5-3-0	yang-50.d	Sample		2012-01-17 05:50:49				FALSE
		ga312.5-1-30	yang-51.d	Sample		2012-01-17 05:55:41				FALSE
		ga312.5-2-30	yang-52.d	Sample		2012-01-17 06:00:34				FALSE
		ga312.5-3-30	yang-53.d	Sample		2012-01-17 06:05:25
		ga1000-1-0	yang-54.d	Sample		2012-01-17 06:10:17
		ga1000-2-0	yang-55.d	Sample		2012-01-17 06:15:09
		ga1000-3-0	yang-56.d	Sample		2012-01-17 06:20:01
		ga1000-1-30	yang-57.d	Sample		2012-01-17 06:24:53
		ga1000-2-30	yang-58.d	Sample		2012-01-17 06:29:45				FALSE
		ga1000-3-30	yang-59.d	Sample		2012-01-17 06:34:37				FALSE
		wash	yang-60.d	Blank		2012-01-17 06:40:40				FALSE

## Sheet: CYP2D6
Sample							youfeiwan Method	youfeiwan Results
		Name	Data File	Type	Level	Acq. Date-Time	Exp. Conc.	RT	Resp.	MI	Calc. Conc.	Final Conc.	Accuracy
		hunbiao-1	hunbiao1.d	Cal	1	2011-12-06 17:58:51	1	0.583467	221.821	FALSE	1.00032	1.00032	100.032
		hunbiao-10	hunbiao2.d	Cal	2	2011-12-06 18:03:45	10	0.59765	4312.47	FALSE	20.7886	20.7886	207.886
		hunbaio-50	hunbiao3.d	Cal	3	2011-12-06 18:08:39	100	0.59765	20771.5	FALSE	100.408	100.408	100.408
		hunbiao-100	hunbiao4.d	Cal	4	2011-12-06 18:13:32	250	0.59765	44215.6	FALSE	213.818	213.818	85.5271
		hunbiao-250	hunbiao5.d	Cal	5	2011-12-06 18:18:24	500	0.583467	111347	FALSE	538.561	538.561	107.712
		hunbiao-500	hunbiao6.d	Cal	6	2011-12-06 18:23:16	1000	0.59765	219801	FALSE	1063.2	1063.2	106.32
		yangxingduizhao0-0-1	blank-3.d	Blank		2012-01-17 01:46:17		1.19328	15.3135	FALSE	0.00134982	0.00134982
		yangxingduizhao0-0-2	yang-1.d	Sample		2012-01-17 01:51:11				FALSE
		yangxingduizhao0-0-3	yang-2.d	Sample		2012-01-17 01:56:05		0.952183	15.2711	FALSE	0.00114463	0.00114463
		yangxingduizhao0-30-1	yang-3.d	Sample		2012-01-17 02:00:59		0.611833	45113.1	FALSE	218.159	218.159
		yangxingduizhao0-30-2	yang-4.d	Sample		2012-01-17 02:05:53		0.611833	39888.2	FALSE	192.884	192.884
		yangxingduizhao0-30-3	yang-5.d	Sample		2012-01-17 02:10:47		0.611833	39618.6	FALSE	191.58	191.58
		ga0.1-1-0	yang-6.d	Sample		2012-01-17 02:15:39		0.569283	26.8729	FALSE	0.0572679	0.0572679
		ga0.1-2-0	yang-7.d	Sample		2012-01-17 02:20:31		0.1722	26.8793	FALSE	0.0572991	0.0572991
		ga0.1-3-0	yang-8.d	Sample		2012-01-17 02:25:24		0.143833	17.2836	FALSE	0.0108803	0.0108803
		ga0.1-1-30	yang-9.d	Sample		2012-01-17 02:30:17		0.611833	38864.4	FALSE	187.932	187.932
		ga0.1-2-30	yang-10.d	Sample		2012-01-17 02:35:11		0.611833	38674.9	FALSE	187.015	187.015
		ga0.1-3-30	yang-11.d	Sample		2012-01-17 02:40:04		0.611833	42537.3	FALSE	205.699	205.699
		ga1-1-0	yang-12.d	Sample		2012-01-17 02:44:58		0.526733	21.7958	FALSE	0.0327078	0.0327078
		ga1-2-0	yang-13.d	Sample		2012-01-17 02:49:51		0.569283	25.0303	FALSE	0.0483542	0.0483542
		ga1-3-0	yang-14.d	Sample		2012-01-17 02:54:45		0.725283	20.4379	FALSE	0.026139	0.026139
		ga1-1-30	yang-15.d	Sample		2012-01-17 02:59:39		0.611833	38506.9	FALSE	186.202	186.202
		ga1-2-30	yang-16.d	Sample		2012-01-17 03:04:33		0.611833	38918	FALSE	188.191	188.191
		ga1-3-30	yang-17.d	Sample		2012-01-17 03:09:25		0.611833	37679.4	FALSE	182.199	182.199
		ga6.25-1-0	yang-18.d	Sample		2012-01-17 03:14:19		0.626017	33.179	FALSE	0.0877733	0.0877733
		ga6.25-2-0	yang-19.d	Sample		2012-01-17 03:19:11		0.583467	58.5689	FALSE	0.210596	0.210596
		ga6.25-3-0	yang-20.d	Sample		2012-01-17 03:24:05		0.725283	56.4819	FALSE	0.2005	0.2005
		ga6.25-1-30	yang-21.d	Sample		2012-01-17 03:28:57		0.611833	40488.3	FALSE	195.787	195.787
		ga6.25-2-30	yang-22.d	Sample		2012-01-17 03:33:51		0.611833	40867	FALSE	197.619	197.619
		ga6.25-3-30	yang-23.d	Sample		2012-01-17 03:38:45		0.611833	38268.2	FALSE	185.048	185.048
		ga31.25-1-0	yang-24.d	Sample		2012-01-17 03:43:36		0.952183	28.0335	FALSE	0.0628821	0.0628821
		ga31.25-2-0	yang-25.d	Sample		2012-01-17 03:48:29		0.725283	13.9386	FALSE	0	0
		ga31.25-3-0	yang-26.d	Sample		2012-01-17 03:53:23		0.59765	23.8341	FALSE	0.0425677	0.0425677
		ga31.25-1-30	yang-27.d	Sample		2012-01-17 03:58:16		0.611833	36894.1	FALSE	178.4	178.4
		ga31.25-2-30	yang-28.d	Sample		2012-01-17 04:03:11		0.611833	39592.9	FALSE	191.456	191.456
		ga31.25-3-30	yang-29.d	Sample		2012-01-17 04:08:05		0.611833	37105.8	FALSE	179.424	179.424
		ga100-1-0	yang-30.d	Sample		2012-01-17 04:12:59		0.611833	16.3022	FALSE	0.00613275	0.00613275
		ga100-2-0	yang-31.d	Sample		2012-01-17 04:17:51		0.611833	31.7223	FALSE	0.0807267	0.0807267
		ga100-3-0	yang-32.d	Sample		2012-01-17 04:22:45		0.923833	30.313	FALSE	0.0739094	0.0739094
		ga100-1-30	yang-33.d	Sample		2012-01-17 04:27:39		0.611833	32478.3	FALSE	157.039	157.039
		ga100-2-30	yang-34.d	Sample		2012-01-17 04:32:33		0.611833	35377.6	FALSE	171.064	171.064
		ga100-3-30	yang-35.d	Sample		2012-01-17 04:37:27		0.611833	38150.5	FALSE	184.478	184.478
		ga156.25-1-0	yang-36.d	Sample		2012-01-17 04:42:20		0.696917	71.7506	FALSE	0.274361	0.274361
		ga156.25-2-0	yang-37.d	Sample		2012-01-17 04:47:12		0.640183	54.5942	FALSE	0.191368	0.191368
		ga156.25-3-0	yang-38.d	Sample		2012-01-17 04:52:07		0.611833	33.8722	FALSE	0.0911266	0.0911266
		ga156.25-1-30	yang-39.d	Sample		2012-01-17 04:57:01		0.611833	33988.6	FALSE	164.345	164.345
		ga156.25-2-30	yang-40.d	Sample		2012-01-17 05:01:55		0.611833	33326.6	FALSE	161.143	161.143
		ga156.25-3-30	yang-41.d	Sample		2012-01-17 05:06:49		0.611833	34465.4	FALSE	166.652	166.652
		ga234-1-0	yang-42.d	Sample		2012-01-17 05:11:43		0.640183	25.4921	FALSE	0.0505882	0.0505882
		ga234-2-0	yang-43.d	Sample		2012-01-17 05:16:37		0.59765	16.619	FALSE	0.00766544	0.00766544
		ga234-3-0	yang-44.d	Sample		2012-01-17 05:21:31		0.626017	63.6937	FALSE	0.235387	0.235387
		ga234-1-30	yang-45.d	Sample		2012-01-17 05:26:25		0.611833	28818.5	FALSE	139.335	139.335
		ga234-2-30	yang-46.d	Sample		2012-01-17 05:31:16		0.611833	27626	FALSE	133.567	133.567
		ga234-3-30	yang-47.d	Sample		2012-01-17 05:36:09		0.611833	30394.5	FALSE	146.959	146.959
		ga312.5-1-0	yang-48.d	Sample		2012-01-17 05:41:02		0.66855	14.7482	FALSE	0	0
		ga312.5-2-0	yang-49.d	Sample		2012-01-17 05:45:55		0.101283	38.7945	FALSE	0.114938	0.114938
		ga312.5-3-0	yang-50.d	Sample		2012-01-17 05:50:49		0.739467	32.3852	FALSE	0.0839333	0.0839333
		ga312.5-1-30	yang-51.d	Sample		2012-01-17 05:55:41		0.611833	13111.7	FALSE	63.3543	63.3543
		ga312.5-2-30	yang-52.d	Sample		2012-01-17 06:00:34		0.611833	23549.1	FALSE	113.845	113.845
		ga312.5-3-30	yang-53.d	Sample		2012-01-17 06:05:25		0.611833	15719.4	FALSE	75.9689	75.9689
		ga1000-1-0	yang-54.d	Sample		2012-01-17 06:10:17		0.611833	57.7837	FALSE	0.206797	0.206797
		ga1000-2-0	yang-55.d	Sample		2012-01-17 06:15:09		0.767833	33.1558	FALSE	0.0876613	0.0876613
		ga1000-3-0	yang-56.d	Sample		2012-01-17 06:20:01		0.28565	12.4011	FALSE	0	0
		ga1000-1-30	yang-57.d	Sample		2012-01-17 06:24:53		0.611833	6187.55	FALSE	29.8592	29.8592
		ga1000-2-30	yang-58.d	Sample		2012-01-17 06:29:45		0.611833	14804.5	FALSE	71.5434	71.5434
		ga1000-3-30	yang-59.d	Sample		2012-01-17 06:34:37		0.611833	15606.7	FALSE	75.4237	75.4237
		wash	yang-60.d	Blank		2012-01-17 06:40:40				FALSE

## Sheet: CYP3A4
Sample							qiangjimidazuolun Method	qiangjimidazuolun Results
		Name	Data File	Type	Level	Acq. Date-Time	Exp. Conc.	RT	Resp.	MI	Calc. Conc.	Final Conc.	Accuracy
		hunbiao-1	hunbiao1.d	Cal	1	2011-12-06 17:58:51	1	1.26222	359.596	FALSE	1.11469	1.11469	111.469
		hunbiao-10	hunbiao2.d	Cal	2	2011-12-06 18:03:45	10	1.29058	4981.88	FALSE	18.9259	18.9259	189.259
		hunbaio-50	hunbiao3.d	Cal	3	2011-12-06 18:08:39	100	1.30477	24235.6	FALSE	93.1169	93.1169	93.1169
		hunbiao-100	hunbiao4.d	Cal	4	2011-12-06 18:13:32	250	1.2764	54425.4	FALSE	209.448	209.448	83.7793
		hunbiao-250	hunbiao5.d	Cal	5	2011-12-06 18:18:24	500	1.2764	147741	FALSE	569.023	569.023	113.805
		hunbiao-500	hunbiao6.d	Cal	6	2011-12-06 18:23:16	1000	1.2764	253954	FALSE	978.297	978.297	97.8297
		yangxingduizhao0-0-1	blank-3.d	Blank		2012-01-17 01:46:17				FALSE
		yangxingduizhao0-0-2	yang-1.d	Sample		2012-01-17 01:51:11				FALSE
		yangxingduizhao0-0-3	yang-2.d	Sample		2012-01-17 01:56:05				FALSE
		yangxingduizhao0-30-1	yang-3.d	Sample		2012-01-17 02:00:59		1.33313	47691.6	FALSE	183.5	183.5
		yangxingduizhao0-30-2	yang-4.d	Sample		2012-01-17 02:05:53		1.41822	1644.4	FALSE	6.06547	6.06547
		yangxingduizhao0-30-3	yang-5.d	Sample		2012-01-17 02:10:47		1.2764	669.699	FALSE	2.30962	2.30962
		ga0.1-1-0	yang-6.d	Sample		2012-01-17 02:15:39
		ga0.1-2-0	yang-7.d	Sample		2012-01-17 02:20:31
		ga0.1-3-0	yang-8.d	Sample		2012-01-17 02:25:24
		ga0.1-1-30	yang-9.d	Sample		2012-01-17 02:30:17		1.30477	11631.7	FALSE	44.5498	44.5498
		ga0.1-2-30	yang-10.d	Sample		2012-01-17 02:35:11
		ga0.1-3-30	yang-11.d	Sample		2012-01-17 02:40:04		1.33313	43438.3	FALSE	167.111	167.111
		ga1-1-0	yang-12.d	Sample		2012-01-17 02:44:58
		ga1-2-0	yang-13.d	Sample		2012-01-17 02:49:51
		ga1-3-0	yang-14.d	Sample		2012-01-17 02:54:45
		ga1-1-30	yang-15.d	Sample		2012-01-17 02:59:39		1.33313	29277	FALSE	112.543	112.543
		ga1-2-30	yang-16.d	Sample		2012-01-17 03:04:33
		ga1-3-30	yang-17.d	Sample		2012-01-17 03:09:25		1.44658	2827.74	FALSE	10.6253	10.6253
		ga6.25-1-0	yang-18.d	Sample		2012-01-17 03:14:19
		ga6.25-2-0	yang-19.d	Sample		2012-01-17 03:19:11
		ga6.25-3-0	yang-20.d	Sample		2012-01-17 03:24:05
		ga6.25-1-30	yang-21.d	Sample		2012-01-17 03:28:57		1.34732	25490.6	FALSE	97.9525	97.9525
		ga6.25-2-30	yang-22.d	Sample		2012-01-17 03:33:51		1.3615	13840	FALSE	53.0592	53.0592
		ga6.25-3-30	yang-23.d	Sample		2012-01-17 03:38:45		1.31895	13955.7	FALSE	53.5049	53.5049
		ga31.25-1-0	yang-24.d	Sample		2012-01-17 03:43:36
		ga31.25-2-0	yang-25.d	Sample		2012-01-17 03:48:29
		ga31.25-3-0	yang-26.d	Sample		2012-01-17 03:53:23
		ga31.25-1-30	yang-27.d	Sample		2012-01-17 03:58:16		1.38985	2861.95	FALSE	10.7571	10.7571
		ga31.25-2-30	yang-28.d	Sample		2012-01-17 04:03:11		1.31895	8820.21	FALSE	33.7162	33.7162
		ga31.25-3-30	yang-29.d	Sample		2012-01-17 04:08:05		1.31895	6775.28	FALSE	25.8364	25.8364
		ga100-1-0	yang-30.d	Sample		2012-01-17 04:12:59
		ga100-2-0	yang-31.d	Sample		2012-01-17 04:17:51
		ga100-3-0	yang-32.d	Sample		2012-01-17 04:22:45
		ga100-1-30	yang-33.d	Sample		2012-01-17 04:27:39		1.33313	7920.56	FALSE	30.2496	30.2496
		ga100-2-30	yang-34.d	Sample		2012-01-17 04:32:33		1.31895	6001.01	FALSE	22.8529	22.8529
		ga100-3-30	yang-35.d	Sample		2012-01-17 04:37:27		1.30477	182.21	FALSE	0.431171	0.431171
		ga156.25-1-0	yang-36.d	Sample		2012-01-17 04:42:20
		ga156.25-2-0	yang-37.d	Sample		2012-01-17 04:47:12
		ga156.25-3-0	yang-38.d	Sample		2012-01-17 04:52:07
		ga156.25-1-30	yang-39.d	Sample		2012-01-17 04:57:01		1.33313	4910.28	FALSE	18.65	18.65
		ga156.25-2-30	yang-40.d	Sample		2012-01-17 05:01:55		1.31895	6517.88	FALSE	24.8446	24.8446
		ga156.25-3-30	yang-41.d	Sample		2012-01-17 05:06:49		1.33313	6570.95	FALSE	25.0491	25.0491
		ga234-1-0	yang-42.d	Sample		2012-01-17 05:11:43
		ga234-2-0	yang-43.d	Sample		2012-01-17 05:16:37
		ga234-3-0	yang-44.d	Sample		2012-01-17 05:21:31
		ga234-1-30	yang-45.d	Sample		2012-01-17 05:26:25		1.31895	1546.26	FALSE	5.68729	5.68729
		ga234-2-30	yang-46.d	Sample		2012-01-17 05:31:16		1.33313	992.395	FALSE	3.55308	3.55308
		ga234-3-30	yang-47.d	Sample		2012-01-17 05:36:09		1.33313	2592.39	FALSE	9.71837	9.71837
		ga312.5-1-0	yang-48.d	Sample		2012-01-17 05:41:02
		ga312.5-2-0	yang-49.d	Sample		2012-01-17 05:45:55
		ga312.5-3-0	yang-50.d	Sample		2012-01-17 05:50:49
		ga312.5-1-30	yang-51.d	Sample		2012-01-17 05:55:41		0.978583	11.2968	FALSE	0	0
		ga312.5-2-30	yang-52.d	Sample		2012-01-17 06:00:34		1.33313	368.261	FALSE	1.14809	1.14809
		ga312.5-3-30	yang-53.d	Sample		2012-01-17 06:05:25		1.34732	126.395	FALSE	0.216096	0.216096
		ga1000-1-0	yang-54.d	Sample		2012-01-17 06:10:17
		ga1000-2-0	yang-55.d	Sample		2012-01-17 06:15:09
		ga1000-3-0	yang-56.d	Sample		2012-01-17 06:20:01
		ga1000-1-30	yang-57.d	Sample		2012-01-17 06:24:53		1.34732	283.894	FALSE	0.822992	0.822992
		ga1000-2-30	yang-58.d	Sample		2012-01-17 06:29:45		1.31895	194.063	FALSE	0.476842	0.476842
		ga1000-3-30	yang-59.d	Sample		2012-01-17 06:34:37		1.33313	136.696	FALSE	0.25579	0.25579
		wash	yang-60.d	Blank		2012-01-17 06:40:40				FALSE
