# Supplementary material for: Glycyrrhetinic acid might increase the nephrotoxicity of bakuchiol by inhibiting cytochrome P450 isoenzymes
Source: PeerJ journal article supplement (doi:10.7717/peerj.2723), 2016-11-22
Supplement: the_NMR_profiles_for_identification_of_BAK.pdf [file the_NMR_profiles_for_identification_of_BAK.pdf]

A

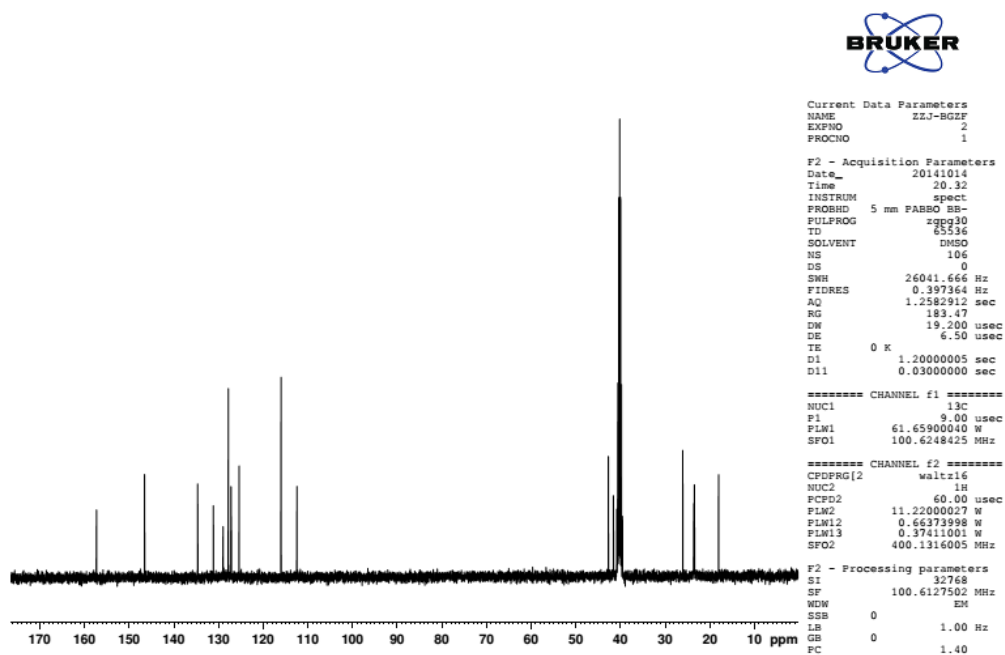

B

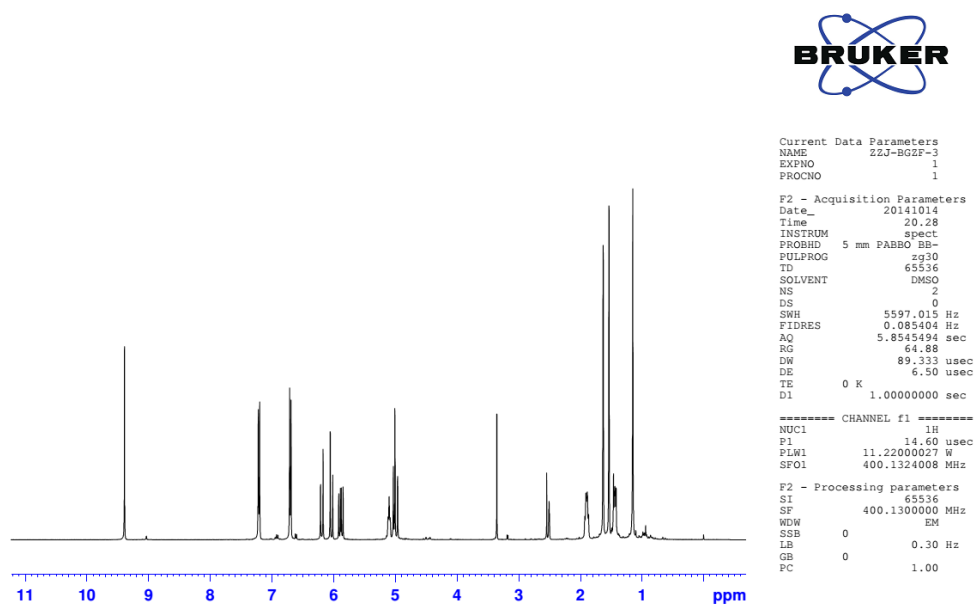

Fig. S1. Identification of bakuchiol (Lot # z131208659). (A) C-NMR profile. (B) H-NMR profile.
